# Supplementary material for: A Novel Predictive Scoring System for 90-Day Mortality among Patients with Hepatocellular Cell Carcinoma Receiving Major Hepatectomy
Source: MDPI journal article supplement (doi:10.3390/cancers14061398), 2022-03-09
Supplement: s1 [file s1]

**Table S1.** All-Cause 90-Day Mortality Assessment Using the American Society of Anesthesiologists Physical Status Classification Among Patients with Hepatocellular Carcinoma Undergoing Major Hepatectomy.

| ASA Cumulative Scores | Major Hepatectomy |        | 90-Day Mortality Rate after Major Hepatectomy |
|-----------------------|-------------------|--------|-----------------------------------------------|
|                       | Survivors         | Deaths |                                               |
| 1                     | 3199              | 195    | 6.10%                                         |
| 2                     | 20343             | 783    | 3.85%                                         |
| 3                     | 29414             | 893    | 3.04%                                         |
| 4                     | 7294              | 854    | 11.71%                                        |

**Table S2.** All-Cause 90-Day Mortality Assessment Using the Charlson Comorbidity Index Scores Among Patients with Hepatocellular Carcinoma Undergoing Major Hepatectomy.

| CCI Cumulative Scores | Major Hepatectomy |        | 90-Day Mortality Rate after Major Hepatectomy |
|-----------------------|-------------------|--------|-----------------------------------------------|
|                       | Survivors         | Deaths |                                               |
| 0                     | 4812              | 258    | 5.36%                                         |
| 1                     | 1829              | 25     | 1.37%                                         |
| 2                     | 9156              | 276    | 3.01%                                         |
| 3                     | 5571              | 217    | 3.90%                                         |
| 4                     | 3595              | 166    | 4.62%                                         |
| 5                     | 8061              | 270    | 3.35%                                         |
| 6                     | 8464              | 300    | 3.54%                                         |
| 7                     | 3150              | 207    | 6.57%                                         |
| 8                     | 9598              | 454    | 4.73%                                         |
| 9                     | 1996              | 183    | 9.17%                                         |
| 10                    | 1697              | 134    | 7.90%                                         |
| 11                    | 1108              | 99     | 8.94%                                         |
| 12                    | 649               | 57     | 8.78%                                         |
| 13                    | 326               | 40     | 12.27%                                        |
| 14                    | 168               | 28     | 16.67%                                        |
| 15+                   | 70                | 11     | 15.71%                                        |

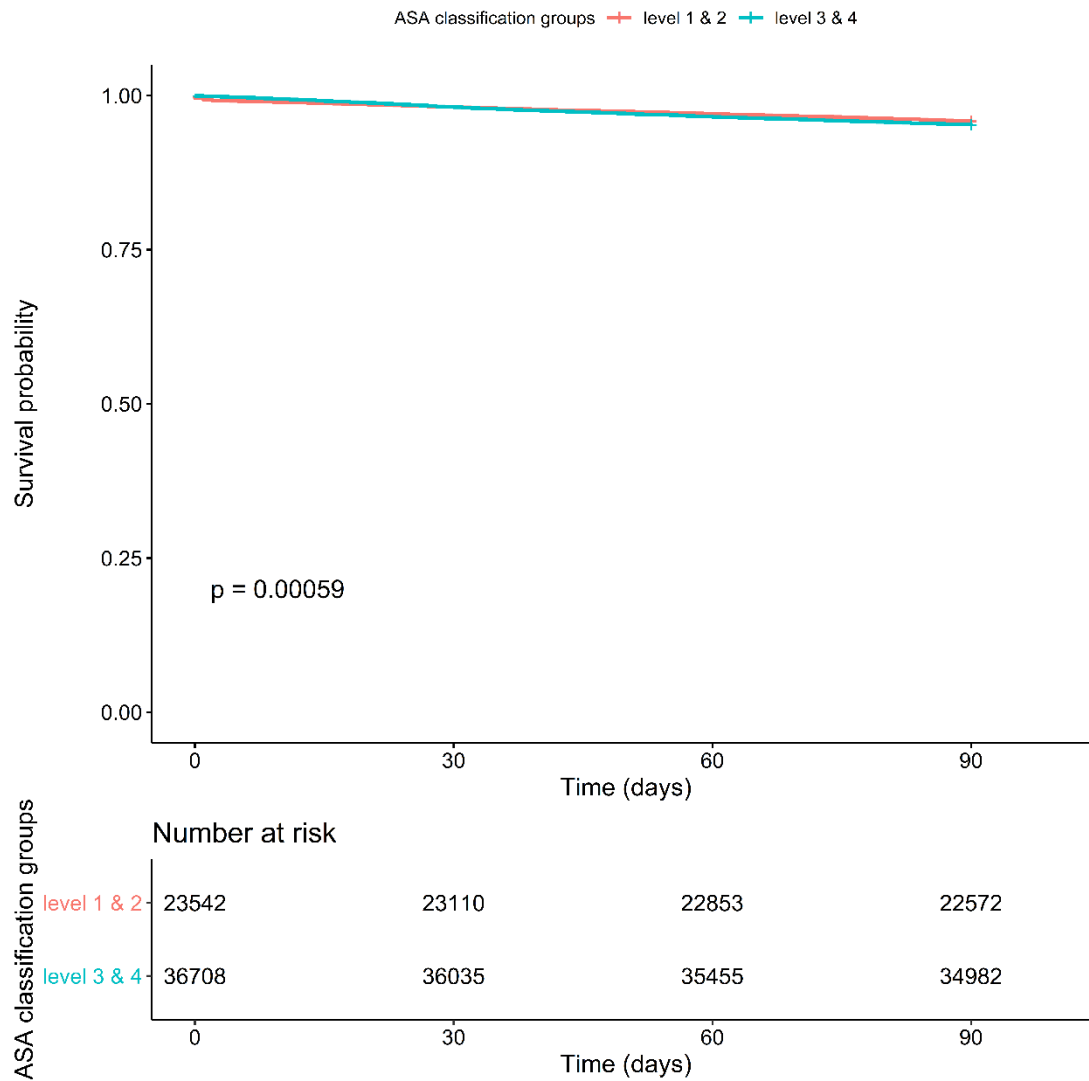

**Figure S1.** Kaplan–Meier Survival Curve for 90-Day Mortality for Four American Society of Anesthesiologists Physical Status Classification Groups. Note:  $P$  (log-rank test) = 0.00059.

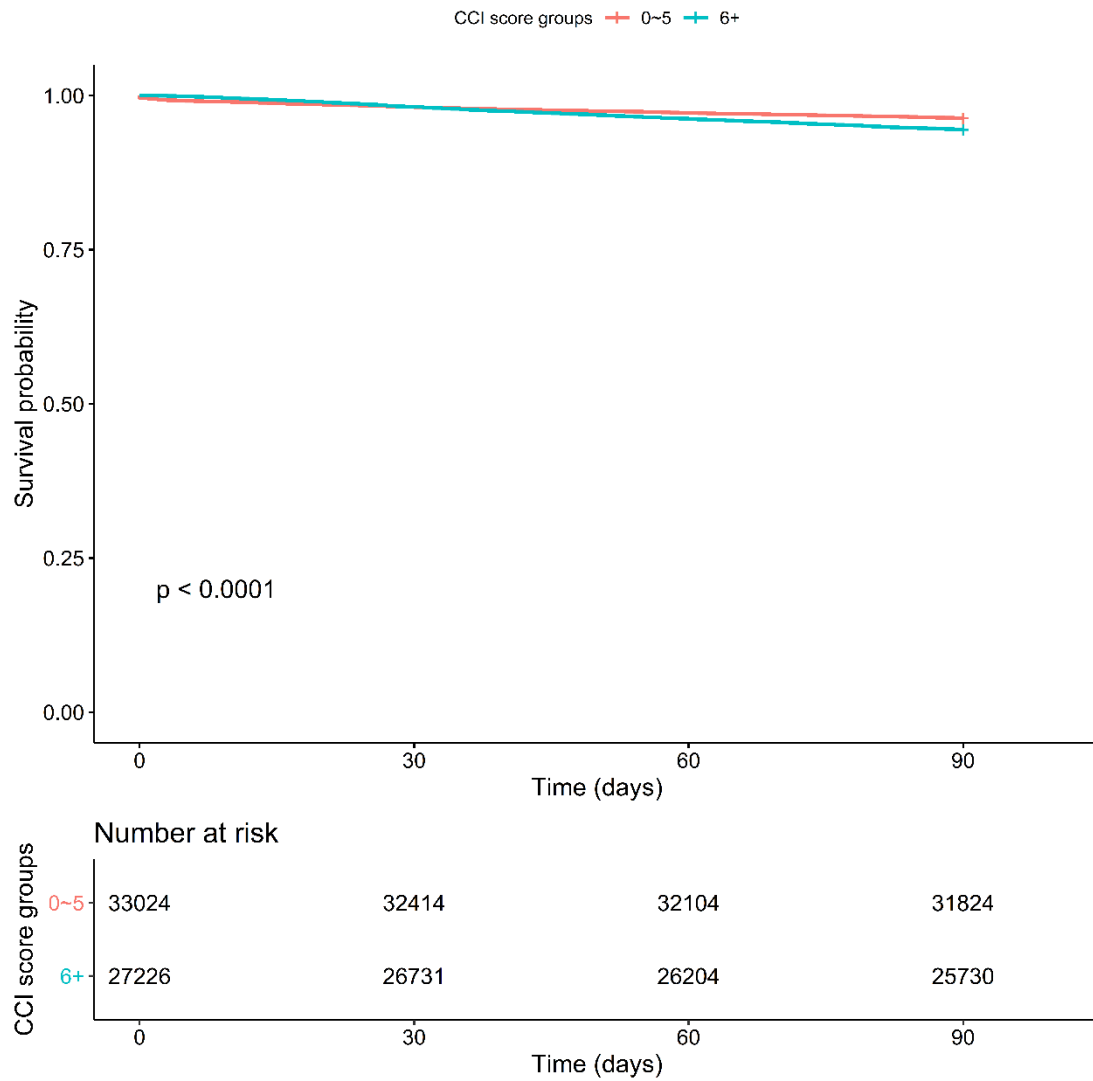

**Figure S2.** Kaplan–Meier Survival Curve for 90-Day Mortality for Two Charlson Comorbidity Index Score Groups. Note:  $P$  (log-rank test)  $< 0.0001$ .

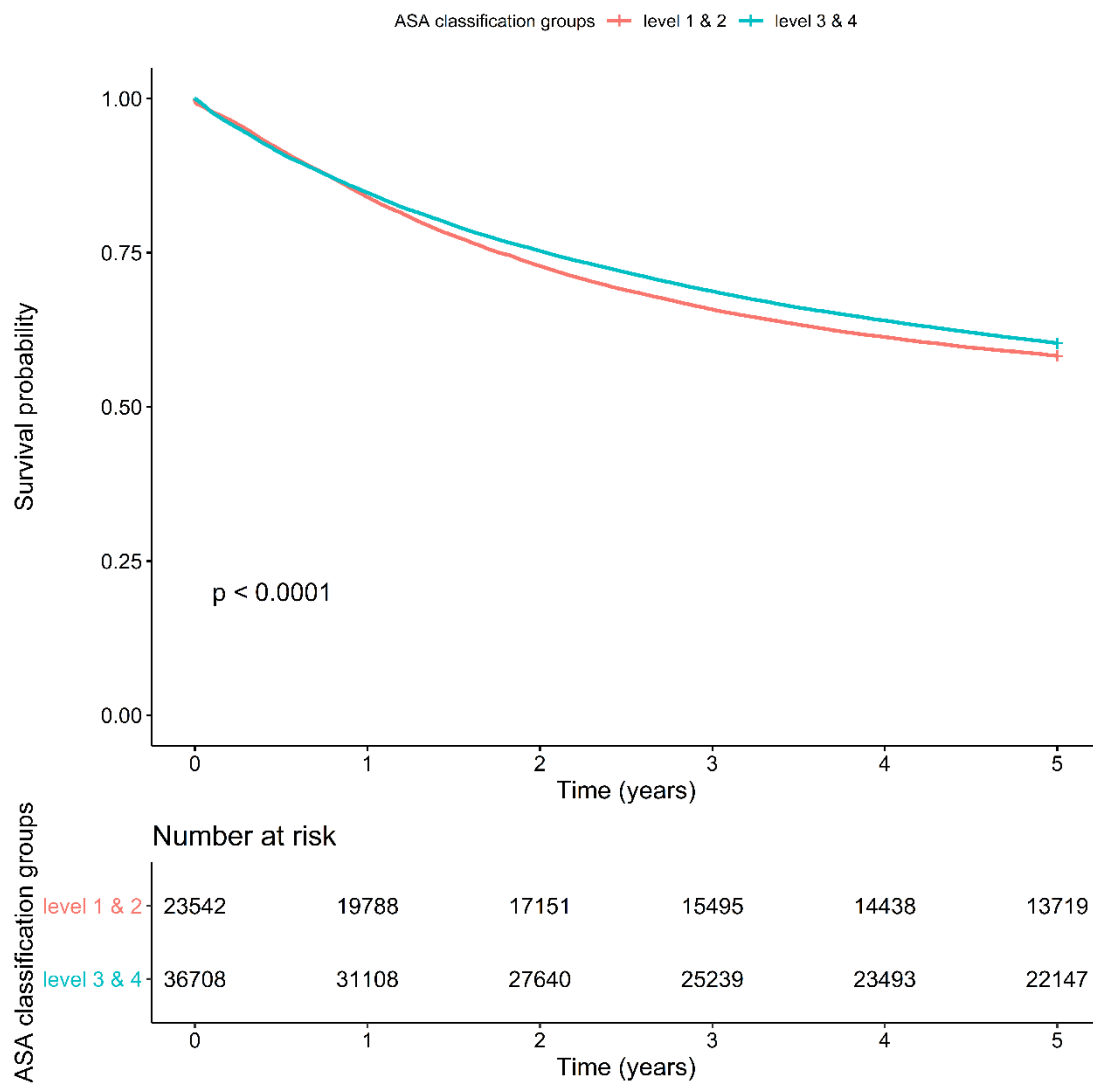

**Figure S3.** Kaplan–Meier 5-Year Survival Curve for Long-Term Mortality Rate of Four American Society of Anesthesiologists Physical Status Classification groups. Note:  $P$  (log-rank test)  $< 0.0001$ .

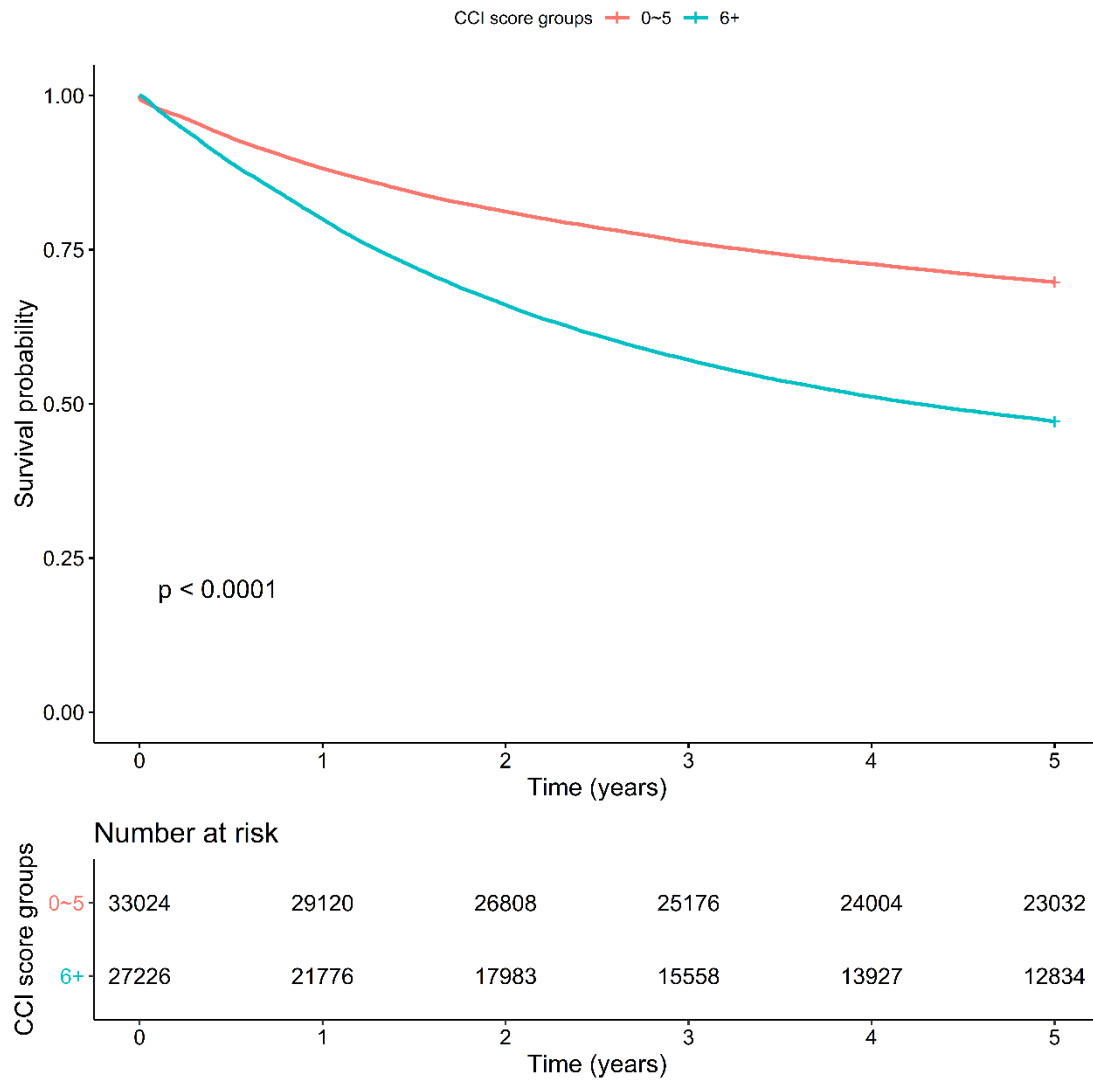

**Figure S4.** Kaplan–Meier 5-Year Survival Curve for Long-Term Mortality Rate of Two Charlson Comorbidity Index Score Groups. Note:  $P$  (log-rank test)  $< 0.0001$ .
